# Supplementary material for: ZnO Modulates Swine Gut Microbiota and Improves Growth Performance of Nursery Pigs When Combined with Peptide Cocktail
Source: PubMed Central journal article supplement (PMC7074828; doi:10.3390/microorganisms8020146), 2020-01-21
Supplement: microorganisms-08-00146-s001.pdf [file microorganisms-08-00146-s001.pdf]

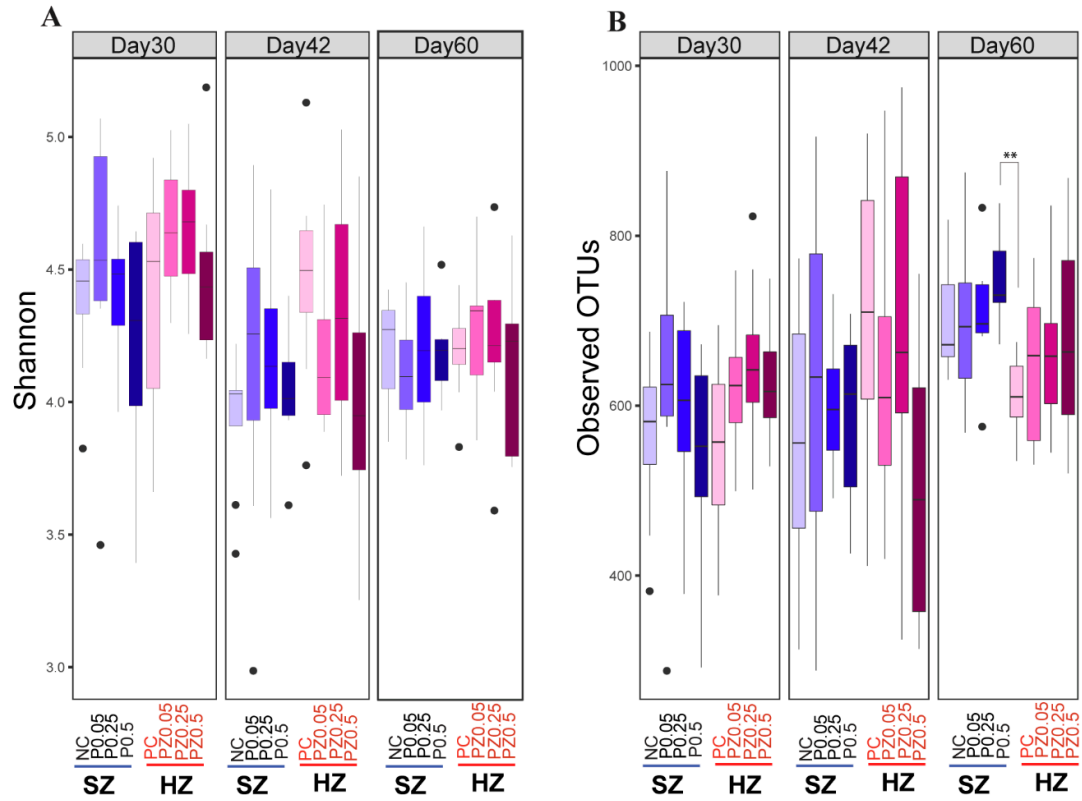

**Figure S1.** Alpha diversity measures for different dietary supplements at three time points. Common indicators such as Shannon (A) and Observed OTUs (B) were used to measure bacterial diversity in all subgroups. Comparisons between subgroups were assessed by pairwise Wilcoxon Ranks Sum test with post hoc Bonferroni test.

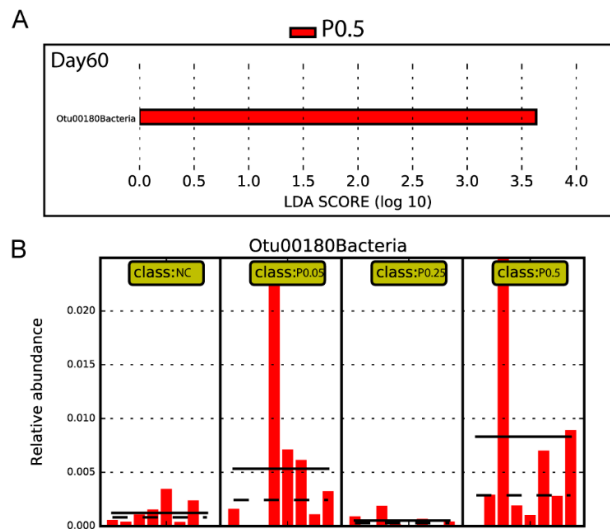

**Figure S2.** LEfSe analyses of gut bacteria in response to different levels of peptide in SZ group. (A) LEfSe identified significantly different bacterial taxa (at OTU level) among subgroups. OTUs in this graph were statistically significant ( $p < 0.05$ ) and had LDA Score  $> 3.5$ , which was considered a significant effect size. (B) Relative abundance of Otu180 in pig rectum. The means and medians are shown as solid and dashed lines in each subgroup. Each column represents one animal.

**Table S1.** Dietary treatments.

|                  |        |                                                                                       |                       |
|------------------|--------|---------------------------------------------------------------------------------------|-----------------------|
| Standard<br>Zinc | NC     | nutrient deficient diet (removed fishmeal in phase2; reduced soybean meal in phase 3) |                       |
|                  | P0.05  |                                                                                       | NC+0.05% Peptide      |
|                  | P0.25  |                                                                                       | NC+0.25% Peptide      |
|                  | P0.5   |                                                                                       | NC+0.5% Peptide       |
| High Zinc        | PC     | nutrient sufficient diet+ZnO                                                          |                       |
|                  | PZ0.05 |                                                                                       | NC+0.05% Peptide +ZnO |
|                  | PZ0.25 |                                                                                       | NC+0.25% Peptide +ZnO |
|                  | PZ0.5  |                                                                                       | NC+0.5% Peptide +ZnO  |

**Table S2.** Peptiva nutrient composition (as fed).

| <b>Nutrient Composition</b> | <b>Percentage</b> |
|-----------------------------|-------------------|
| Crude protein:              | 51.25             |
| Lysine                      | 2.72              |
| Methionine                  | 0.73              |
| Phenylalanine               | 1.72              |
| Threonine                   | 1.59              |
| Tyrosine                    | 1.16              |
| Valine                      | 1.93              |
| Iso-leucine                 | 1.58              |
| Leucine                     | 2.99              |
| Crude fat                   | 6.34              |
| Fiber                       | 5.38              |
| Ash                         | 11.31             |
| Moisture                    | 5.97              |
| Other                       | 19.75             |

**Table S3.** Diet Ingredient.

|                     | Phase 1 | Phase 2 |       | Phase 3 |       |
|---------------------|---------|---------|-------|---------|-------|
|                     |         | PC      | NC    | PC      | NC    |
| Ingredients, %      |         |         |       |         |       |
| Corn                | 39.77   | 56.38   | 59.06 | 50.29   | 54.79 |
| Soybean meal        | 22.5    | 27.60   | 27.60 | 28.20   | 23.96 |
| Corn DDGS           | 0       | 5.00    | 5.00  | 15.00   | 15.00 |
| Monocalcium P       | 0.65    | 0.54    | 0.94  | 0.40    | 0.45  |
| Limestone           | 0.45    | 0.93    | 1.16  | 1.10    | 1.11  |
| Salt                | 0.25    | 0.50    | 0.50  | 0.50    | 0.50  |
| L-Lysine            | 0.21    | 0.42    | 0.42  | 0.47    | 0.47  |
| DL-Methionine       | 0.165   | 0.18    | 0.18  | 0.15    | 0.15  |
| L-Threonine         | 0.049   | 0.13    | 0.13  | 0.11    | 0.11  |
| L-Tryptophan        | 0.0275  | 0.04    | 0.04  | 0.03    | 0.03  |
| ZnO                 | 0       | 0.32    |       | 0.32    |       |
| Plasma (AP-920)     | 3       | 1.50    | 1.50  |         |       |
| Fish Meal, Menhaden | 6       | 3.00    |       |         |       |
| Milk, Whey Powder   | 20      |         |       |         |       |
| L-Valine            | 0       | 0.04    | 0.04  |         |       |
| Milk, Lactose       | 3.5     |         |       |         |       |
| Other*              | 3.43    | 3.43    | 3.43  | 3.43    | 3.43  |
| Total               | 100     | 100     | 100   | 100     | 100   |
| Calculate           |         |         |       |         |       |

|                          |        |       |       |       |       |
|--------------------------|--------|-------|-------|-------|-------|
| ME, kcal/kg              | 3487   | 3437  | 3427  | 3426  | 3439  |
| CP (%)                   | 22.81  | 23.0  | 21.3  | 22.4  | 20.8  |
| SID Lysine (%)           | 1.46   | 1.42  | 1.29  | 1.28  | 1.18  |
| Total P (%)              | 0.77   | 0.60  | 0.60  | 0.51  | 0.50  |
| Available P (%)          | 0.55   | 0.35  | 0.35  | 0.25  | 0.25  |
| Aval. P (%) with phytase | 0.58   | 0.38  | 0.38  | 0.28  | 0.28  |
| Ca (%)                   | 0.85   | 0.76  | 0.76  | 0.65  | 0.65  |
| SID M+C:Lys              | 58.07  | 58.0  | 59.6  | 58.1  | 60.1  |
| SID Thr:Lys              | 60.09  | 60.0  | 61.2  | 60.0  | 60.4  |
| SID Trp:Lys              | 20.05  | 19.1  | 19.7  | 19.0  | 18.7  |
| SID Ile:Lys              | 58.98  | 56.7  | 57.4  | 60.2  | 59.5  |
| SID Val:Lys              | 66.92  | 67.0  | 68.0  | 67.0  | 67.0  |
| SID Leu:Lys              | 118.48 | 121.1 | 125.3 | 134.5 | 138.0 |

**Others:** Poultry fat (3%), trace mineral premix (0.15%), Vitamin premix (0.25%), antioxidant (0.03%), and phytase (0.003%) were added to all diets.

All pigs were fed common phase1 diet and then experimental phase2 and phase3 diets were introduced. Peptide was added on negative control diet at concentration of 0.05%, 0.25% and 0.5% to achieve P0.05, P0.25, and P0.5, while additional Zn as ZnO together with 0.05%, 0.25% and 0.5% of peptide was added to form PZ0.05, PZ0.25, and PZ0.5. Phase1: d 21-30; Phase2: d31-42; Phase3: d43-60.

**Table S4.** Effect of Peptide cocktail on BW and ADG in nursery pigs fed diets with or without ZnO (least square means  $\pm$  SE) <sup>1</sup>.

|                  | PC                              | NC                              | P0.05                            | P0.25                          | P0.5                             | PZ0.05                           | PZ0.25                          | PZ0.5                          | P-Value |
|------------------|---------------------------------|---------------------------------|----------------------------------|--------------------------------|----------------------------------|----------------------------------|---------------------------------|--------------------------------|---------|
| <b>ADG, kg/d</b> |                                 |                                 |                                  |                                |                                  |                                  |                                 |                                |         |
| NP2              | 0.274 $\pm$ 0.018 <sup>ab</sup> | 0.253 $\pm$ 0.017 <sup>ab</sup> | 0.235 $\pm$ 0.017 <sup>ab</sup>  | 0.224 $\pm$ 0.017 <sup>a</sup> | 0.272 $\pm$ 0.017 <sup>ab</sup>  | 0.234 $\pm$ 0.018 <sup>ab</sup>  | 0.307 $\pm$ 0.017 <sup>bc</sup> | 0.360 $\pm$ 0.017 <sup>c</sup> | <0.0001 |
| NP3              | 0.609 $\pm$ 0.025 <sup>b</sup>  | 0.539 $\pm$ 0.024 <sup>ab</sup> | 0.562 $\pm$ 0.024 <sup>ab</sup>  | 0.505 $\pm$ 0.024 <sup>a</sup> | 0.543 $\pm$ 0.024 <sup>ab</sup>  | 0.585 $\pm$ 0.025 <sup>b</sup>   | 0.604 $\pm$ 0.024 <sup>b</sup>  | 0.592 $\pm$ 0.024 <sup>b</sup> | 0.0012  |
| NP2-3            | 0.500 $\pm$ 0.018 <sup>cd</sup> | 0.441 $\pm$ 0.018 <sup>ab</sup> | 0.453 $\pm$ 0.018 <sup>abc</sup> | 0.407 $\pm$ 0.018 <sup>a</sup> | 0.452 $\pm$ 0.018 <sup>abc</sup> | 0.477 $\pm$ 0.018 <sup>bcd</sup> | 0.502 $\pm$ 0.018 <sup>cd</sup> | 0.514 $\pm$ 0.018 <sup>d</sup> | <0.0001 |
| <b>BW, kg</b>    |                                 |                                 |                                  |                                |                                  |                                  |                                 |                                |         |
| NP1              | 5.60 $\pm$ 0.45                 | 5.73 $\pm$ 0.45                 | 5.65 $\pm$ 0.45                  | 5.64 $\pm$ 0.45                | 5.69 $\pm$ 0.45                  | 5.44 $\pm$ 0.45                  | 5.63 $\pm$ 0.45                 | 5.60 $\pm$ 0.45                | 0.1771  |
| NP2              | 8.34 $\pm$ 0.51 <sup>ab</sup>   | 8.32 $\pm$ 0.51 <sup>a</sup>    | 8.08 $\pm$ 0.51 <sup>a</sup>     | 7.88 $\pm$ 0.51 <sup>a</sup>   | 8.41 $\pm$ 0.51 <sup>ab</sup>    | 7.77 $\pm$ 0.51 <sup>a</sup>     | 8.70 $\pm$ 0.51 <sup>ab</sup>   | 9.20 $\pm$ 0.51 <sup>b</sup>   | 0.0006  |
| NP3              | 20.22 $\pm$ 0.93 <sup>bc</sup>  | 18.57 $\pm$ 0.92 <sup>ab</sup>  | 18.90 $\pm$ 0.92 <sup>abc</sup>  | 17.45 $\pm$ 0.92 <sup>a</sup>  | 18.83 $\pm$ 0.92 <sup>abc</sup>  | 19.38 $\pm$ 0.94 <sup>bc</sup>   | 20.21 $\pm$ 0.92 <sup>bc</sup>  | 20.51 $\pm$ 0.92 <sup>c</sup>  | <0.0001 |

**Notes:** Pigs were fed common phase 1 diet for 10 days and then switched to experimental diets for nursery phase (NP) 2 and 3. Least square means results are presented. Data with different superscripts in the same row indicate significant different ( $p < 0.05$ ). ADG: average daily gain; BW: body weight (recorded on the end of each phase). NP1: d 21-30; NP2: d31-42; NP3: d43-60. <sup>1</sup> ADG (NP1) and feed efficiency (NP1) were used as covariant for BW and ADG analysis.

**Table S5.** Effect of Peptide cocktail on ADFI and G:F in nursery pigs fed diets with or without ZnO(least square means  $\pm$  SE)<sup>1</sup>.

|                   | PC                              | NC                             | P0.05                          | P0.25                          | P0.5                            | PZ0.05                         | PZ0.25                          | PZ0.5                          | P-Value |
|-------------------|---------------------------------|--------------------------------|--------------------------------|--------------------------------|---------------------------------|--------------------------------|---------------------------------|--------------------------------|---------|
| <b>ADFI, kg/d</b> |                                 |                                |                                |                                |                                 |                                |                                 |                                |         |
| NP2               | 0.315 $\pm$ 0.018               | 0.310 $\pm$ 0.017              | 0.292 $\pm$ 0.017              | 0.301 $\pm$ 0.017              | 0.310 $\pm$ 0.017               | 0.299 $\pm$ 0.019              | 0.345 $\pm$ 0.017               | 0.336 $\pm$ 0.017              | 0.3173  |
| NP3               | 0.682 $\pm$ 0.037               | 0.643 $\pm$ 0.037              | 0.719 $\pm$ 0.037              | 0.626 $\pm$ 0.036              | 0.663 $\pm$ 0.037               | 0.724 $\pm$ 0.041              | 0.746 $\pm$ 0.036               | 0.770 $\pm$ 0.037              | 0.0288  |
| NP2-3             | 0.555 $\pm$ 0.027               | 0.528 $\pm$ 0.027              | 0.572 $\pm$ 0.027              | 0.514 $\pm$ 0.027              | 0.541 $\pm$ 0.027               | 0.577 $\pm$ 0.030              | 0.608 $\pm$ 0.027               | 0.620 $\pm$ 0.027              | 0.0338  |
| <b>G:F</b>        |                                 |                                |                                |                                |                                 |                                |                                 |                                |         |
| NP2               | 0.883 $\pm$ 0.048 <sup>ab</sup> | 0.797 $\pm$ 0.046 <sup>a</sup> | 0.772 $\pm$ 0.046 <sup>a</sup> | 0.749 $\pm$ 0.046 <sup>a</sup> | 0.893 $\pm$ 0.047 <sup>ab</sup> | 0.783 $\pm$ 0.049 <sup>a</sup> | 0.890 $\pm$ 0.046 <sup>ab</sup> | 1.056 $\pm$ 0.047 <sup>b</sup> | 0.0011  |
| NP3               | 0.864 $\pm$ 0.028               | 0.840 $\pm$ 0.027              | 0.791 $\pm$ 0.027              | 0.808 $\pm$ 0.027              | 0.827 $\pm$ 0.027               | 0.798 $\pm$ 0.029              | 0.818 $\pm$ 0.027               | 0.772 $\pm$ 0.027              | 0.3367  |

NP2-3 0.867±0.024 0.832±0.024 0.786±0.024 0.796±0.024 0.837±0.024 0.796±0.025 0.833±0.024 0.827±0.024 0.2666

**Notes:** Pigs were fed common phase1 diet for 10 days and then switched to experimental diets for nursery phase (NP) 2 and 3. Least square means results are presented. Data with different superscripts in the same row indicate significant differences ( $p < 0.05$ ). ADFI: average daily feed intake; G:F: feed efficiency. NP1: d 21-30; NP2: d31-42; NP3: d43-60. <sup>1</sup>ADFI (NP1) and feed efficiency (NP1) were used as a covariant for ADFI analysis, while feed efficiency was used as covariant for feed efficiency analysis.

**Table S6.** Contrast result of BW and ADG (covariance included).

|           | No Zinc       |              | Zinc          |              | Linear Pep *<br>Zinc | Quad. Pep *<br>Zinc |
|-----------|---------------|--------------|---------------|--------------|----------------------|---------------------|
|           | Linear<br>Pep | Quad.<br>Pep | Linear<br>Pep | Quad.<br>Pep |                      |                     |
| ADG, kg/d |               |              |               |              |                      |                     |
| NP2       | 0.1162        | 0.1969       | <.0001        | 0.4313       | 0.0182               | 0.1473              |
| NP3       | 0.5351        | 0.0211       | 0.8307        | 0.4554       | 0.5512               | 0.0335              |
| NP2-3     | 0.8813        | 0.0053       | 0.0638        | 0.5493       | 0.1948               | 0.0174              |
| BW, kg    |               |              |               |              |                      |                     |
| NP1       | 0.6229        | 0.7200       | 0.1167        | 0.1322       | 0.3998               | 0.1856              |
| NP2       | 0.2090        | 0.1514       | <.0001        | 0.2441       | 0.0131               | 0.0711              |
| NP3       | 0.9527        | 0.0050       | 0.0721        | 0.5078       | 0.1880               | 0.0150              |

**Notes:** Pigs were fed common phase 1 diet for 10 days and then switched to experimental diets for nursery phase (NP) 2 and 3. ADG: average daily gain; BW: body weight (recorded on the end of each phase). NP1: d 21-30; NP2: d31-42; NP3: d43-60.

**Table S7.** Analysis of similarity (ANOSIM) was used to study swine gut microbiome dissimilarities between the different levels of peptide within SZ or HZ group based on the Braycurtis or Jaccard distances.

**Braycurtis**

|              | Day30<br>(starting point) |       | Day42 |      | Day60 |       |
|--------------|---------------------------|-------|-------|------|-------|-------|
|              | R                         | P     | R     | P    | R     | P     |
|              | NC vs P0.05               | -0.04 | 0.67  | 0.00 | 0.48  | -0.09 |
| NC vs P0.25  | 0.03                      | 0.25  | -0.02 | 0.54 | 0.03  | 0.34  |
| NC vs P0.5   | 0.03                      | 0.30  | -0.07 | 0.74 | 0.01  | 0.38  |
| PC vs PZ0.05 | 0.03                      | 0.28  | -0.04 | 0.73 | 0.01  | 0.40  |
| PC vs PZ0.25 | 0.05                      | 0.28  | -0.13 | 0.99 | 0.04  | 0.22  |
| PC vs PZ0.5  | -0.05                     | 0.76  | -0.03 | 0.63 | 0.03  | 0.28  |

**Jaccard**

|              | Day30<br>(starting point) |       | Day42 |       | Day60 |      |
|--------------|---------------------------|-------|-------|-------|-------|------|
|              | R                         | P     | R     | P     | R     | P    |
|              | NC vs P0.05               | -0.03 | 0.67  | -0.02 | 0.53  | 0.00 |
| NC vs P0.25  | -0.05                     | 0.76  | 0.09  | 0.06  | 0.03  | 0.26 |
| NC vs P0.5   | -0.02                     | 0.56  | -0.07 | 0.87  | -0.03 | 0.69 |
| PC vs PZ0.05 | 0.02                      | 0.29  | -0.04 | 0.66  | -0.02 | 0.56 |
| PC vs PZ0.25 | 0.02                      | 0.36  | -0.11 | 1.00  | 0.00  | 0.50 |
| PC vs PZ0.5  | 0.00                      | 0.38  | 0.07  | 0.13  | 0.01  | 0.41 |
